# Supplementary material for: Ocular instillation of conditioned medium from mesenchymal stem cells is effective for dry eye syndrome by improving corneal barrier function
Source: Springer Nature journal article supplement (doi:10.1038/s41598-023-40136-2), 2023-08-11
Supplement: MOESM1 [file 41598_2023_40136_MOESM1_ESM.pdf]

# **Supplementary Figures 1-7**

**Ocular instillation of conditioned medium from mesenchymal stem cells is effective for dry eye syndrome by improving corneal barrier function**

Tsutomu Imaizumi, Ryuhei Hayashi, Yuji Kudo, Xiaoqin Li, Kaito Yamaguchi, Shun Shibata, Toru Okubo, Tsuyoshi Ishii, Yoichi Honma, and Kohji Nishida

# Supplementary Figure S1

**a**

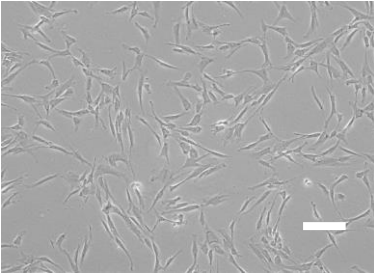

**b**

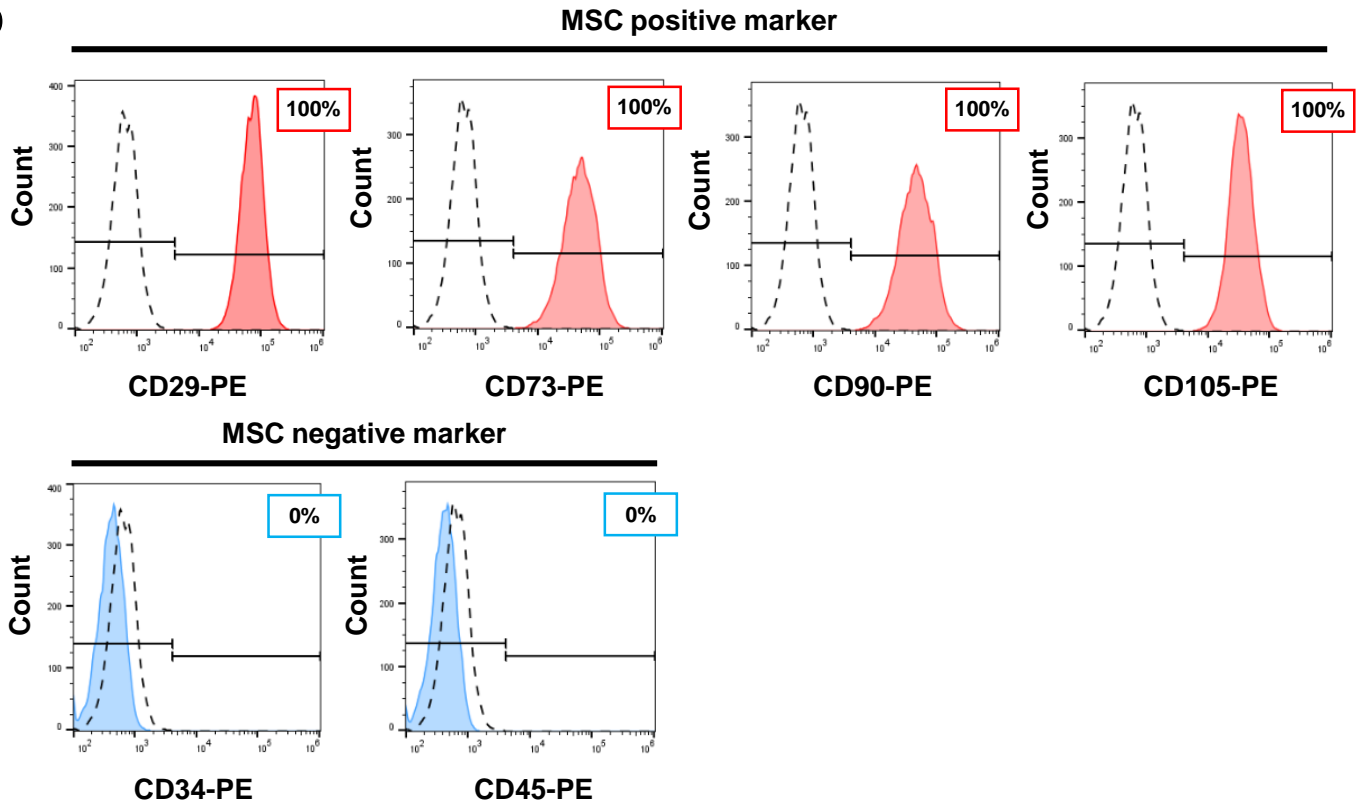

**Supplementary Figure S1. Characteristics of hAdMSCs.** (a) Phase images of hAdMSCs. Scale bar, 200  $\mu$ m.  $n = 12$  biological replicates. (b) Expression of hMSC positive and negative markers.  $n = 3$  biological replicates. hAdMSCs; human adipose-derived mesenchymal stem cells.

# Supplementary Figure S2

**a**

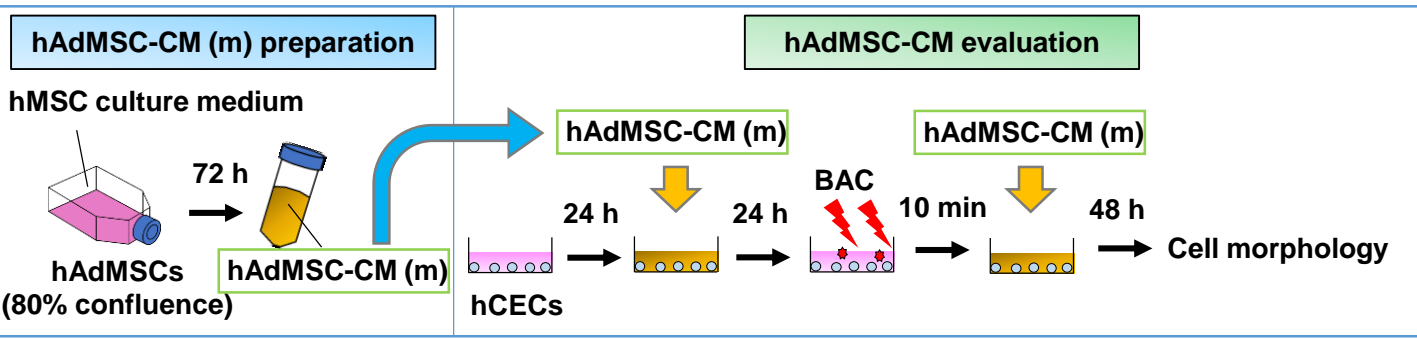

**b**

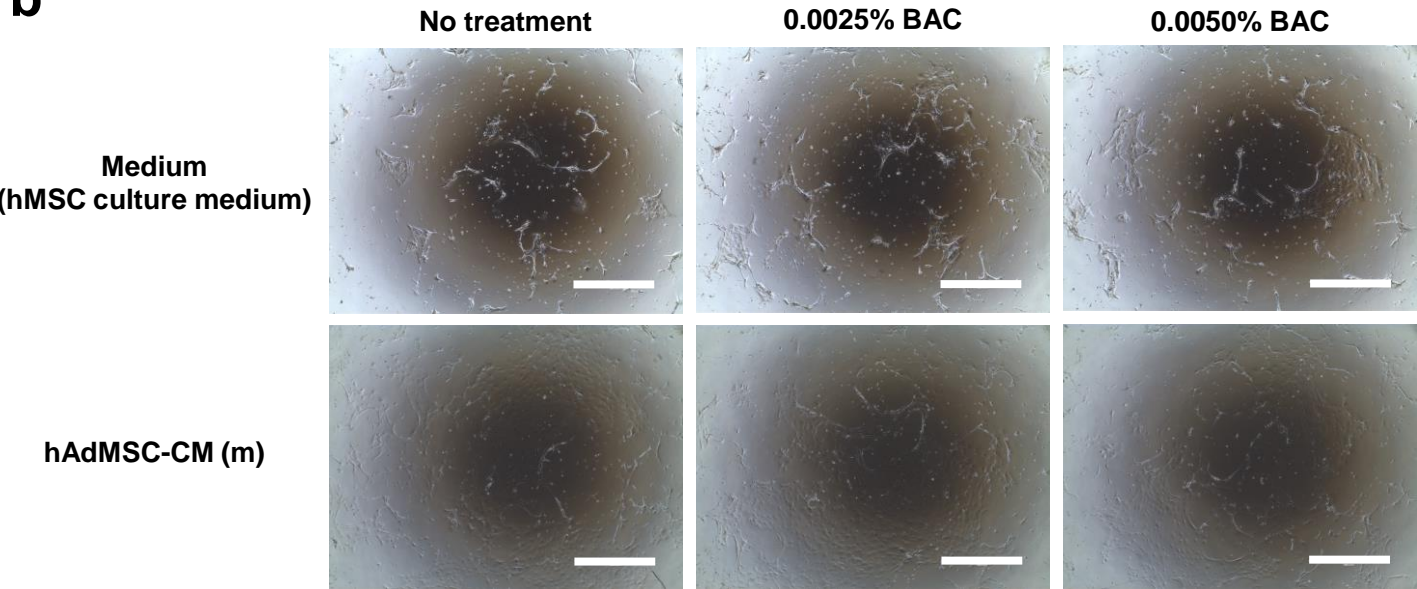

**Supplementary Figure S2. Morphology of hCECs could not be maintained by hAdMSC-CM derived from hMSC culture medium.** (a) Schematic representation of hAdMSC-CM preparation using hMSC culture medium (hAdMSC-CM (m)) and the evaluation of hAdMSC-CM (m) on hCECs. (b) Phase images of hCECs 2 days after treatment with or without BAC. Scale bar, 1000  $\mu$ m.  $n = 9$  biological replicates. hAdMSC-CM; conditioned medium of human adipose-derived mesenchymal stem cells, BAC; benzalkonium chloride, hCECs; human corneal epithelial cells.

# Supplementary Figure S3

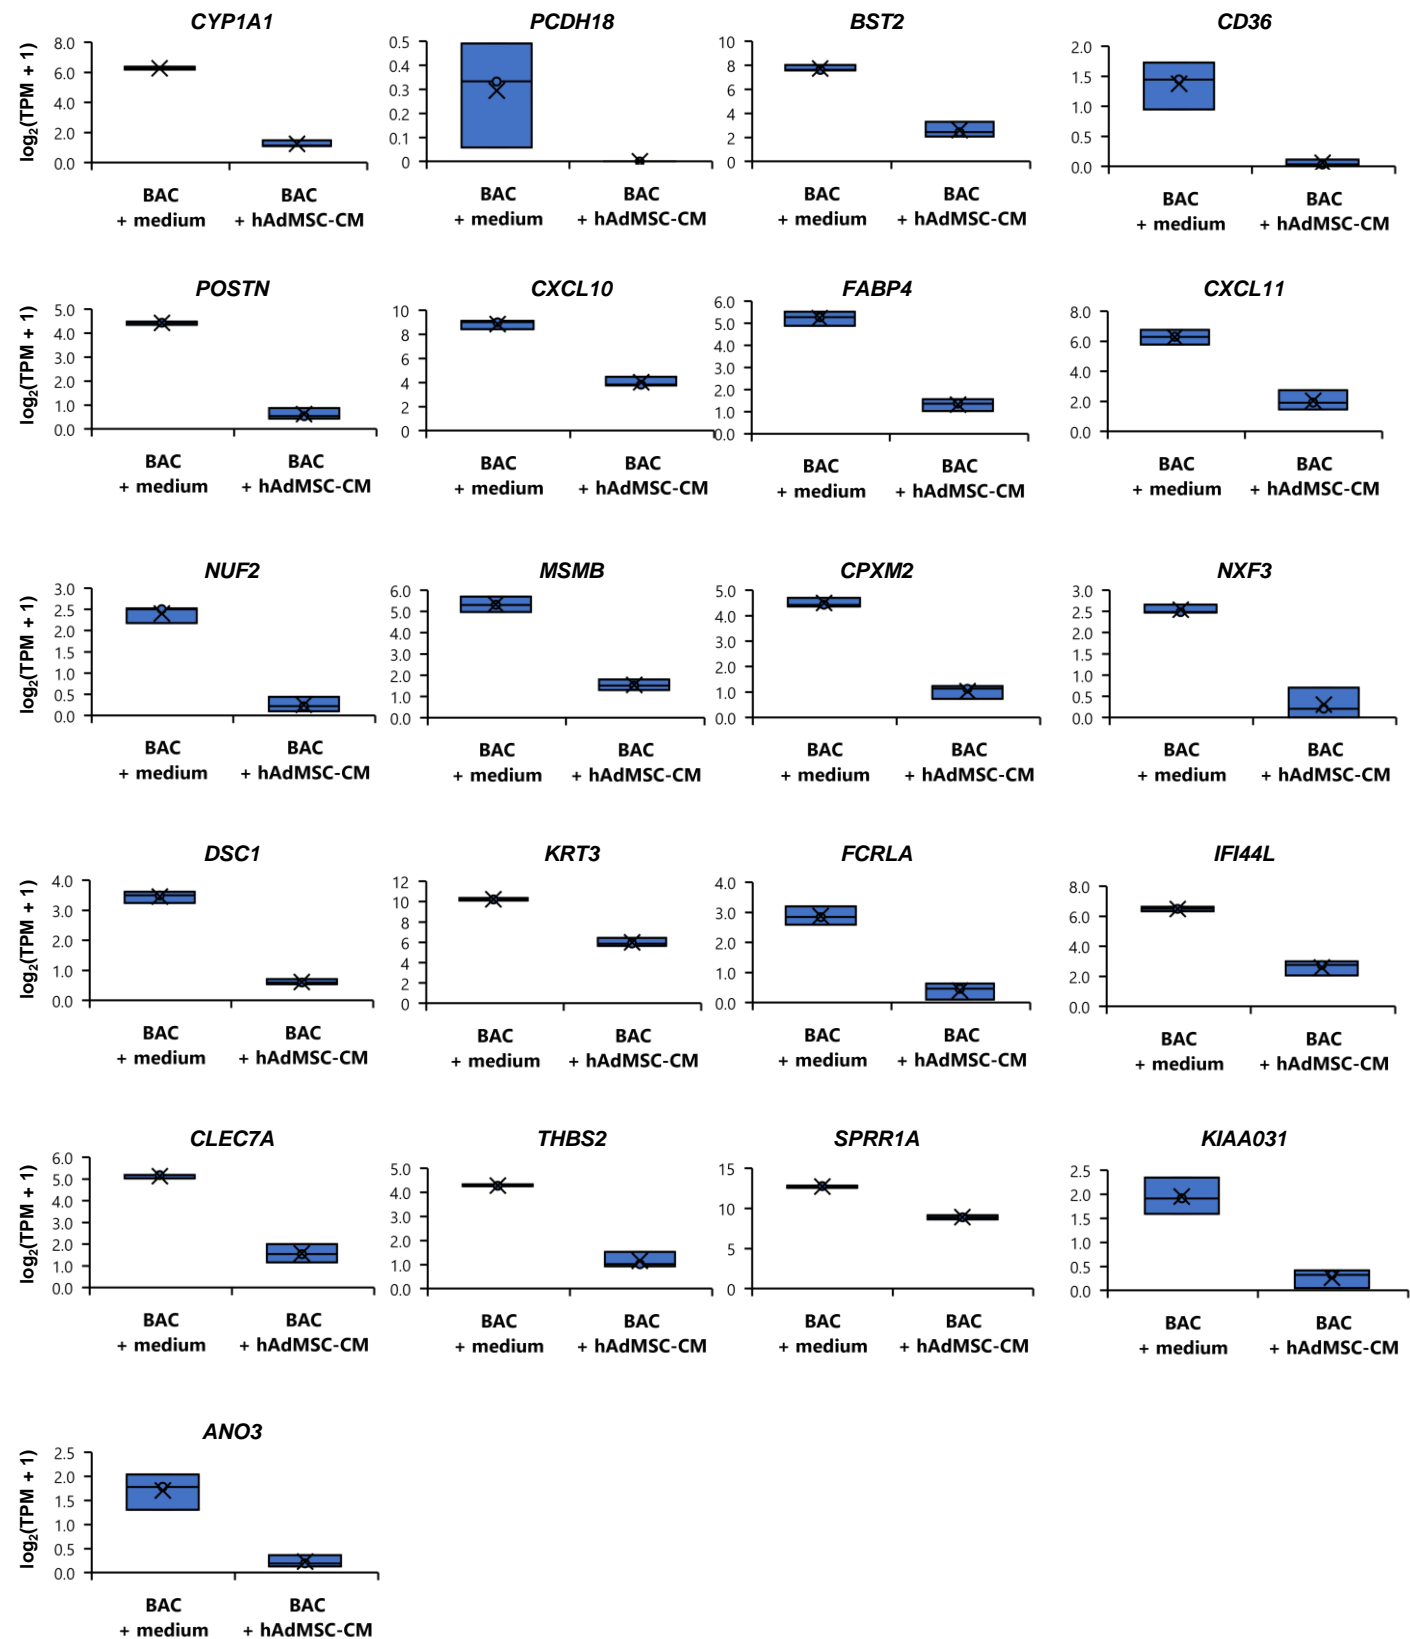

**Supplementary Figure S3. Expressions levels of TGFβ or JAK-STAT signalling pathways-related genes.** Box plots of TGFβ or JAK-STAT signalling pathways-related genes in the top 30 genes with significant fold reductions in expression levels due to hAdMSC-CM. *n* = 3 biological replicates.

# Supplementary Figure S4

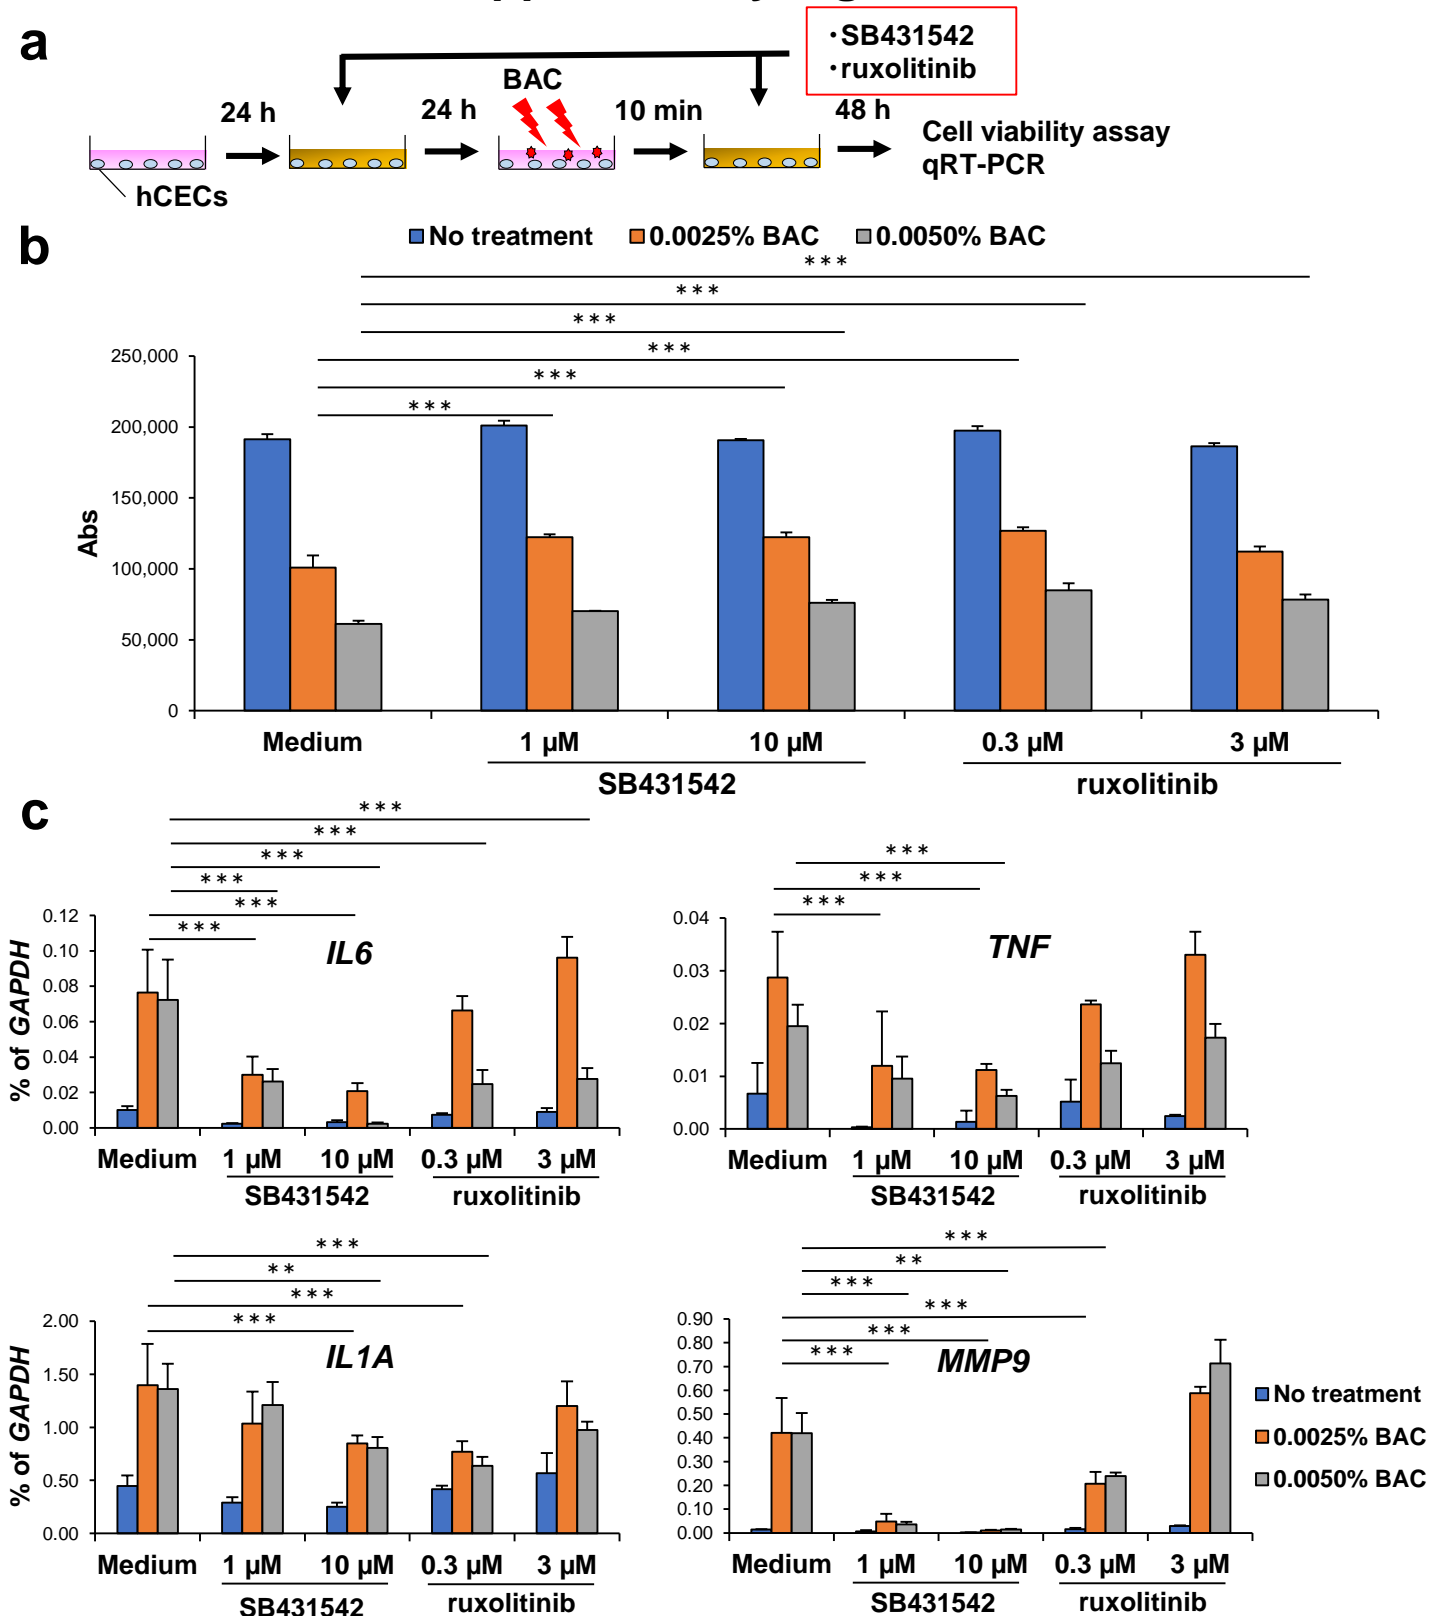

**Supplementary Figure S4. BAC-induced cytotoxicity and inflammation of hCECs are suppressed by inhibition of TGF $\beta$  and JAK-STAT signalling pathways.** (a) Schematic representation of the evaluation of SB431542 and ruxolitinib on BAC-induced cytotoxicity and inflammation of hCECs. (b) Cell viability assay of hCECs 2 days after treatment with or without BAC. The results are presented as the mean  $\pm$  SD;  $n = 4$  biological replicates. \*\*\* $p < 0.001$ . (c) Expression levels of inflammation-related genes in hCECs 2 days after treatment with or without BAC. The results are presented as the mean  $\pm$  SD;  $n = 4$  biological replicates. \*\* $p < 0.01$ , and \*\*\* $p < 0.001$ .

# Supplementary Figure S5

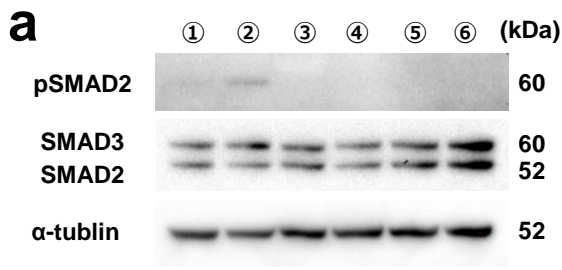

- ① No treatment
- ② 0.0025% BAC
- ③ 10  $\mu$ M SB431542
- ④ 0.0025% BAC + 10  $\mu$ M SB431542
- ⑤ 30  $\mu$ M SB431542
- ⑥ 0.0025% BAC + 30  $\mu$ M SB431542

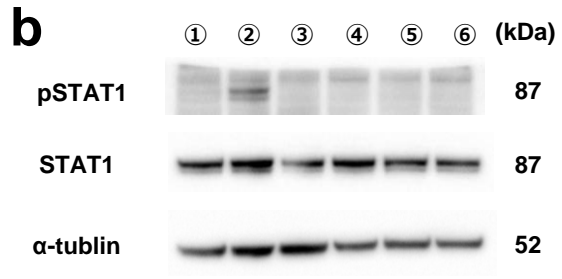

- ① No treatment
- ② 0.0025% BAC
- ③ 3  $\mu$ M ruxolitinib
- ④ 0.0025% BAC + 3  $\mu$ M ruxolitinib
- ⑤ 30  $\mu$ M ruxolitinib
- ⑥ 0.0025% BAC + 30  $\mu$ M ruxolitinib

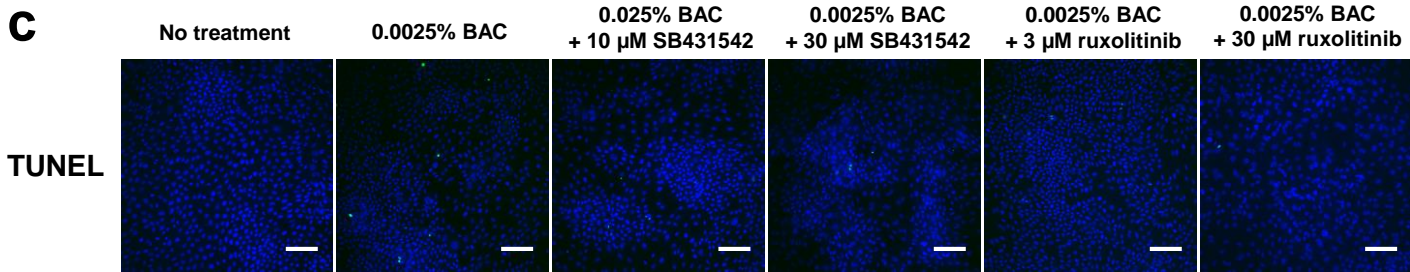

**Supplementary Figure S5. Number of apoptotic cells was not increased by inhibition of TGF $\beta$  and JAK-STAT signalling pathways.** (a) Expression of TGF $\beta$  signalling-related proteins.  $n = 3$  biological replicates. (b) Expression of JAK-STAT signalling-related proteins.  $n = 3$  biological replicates. (c) Fluorescein staining images of TUNEL in hCECs 1 day after treatment with or without BAC. Scale bar, 100  $\mu$ m.  $n = 4$  biological replicates. TUNEL; Terminal deoxynucleotidyl transferase dUTP nick end labelling.

# Supplementary Figure S6

**a**

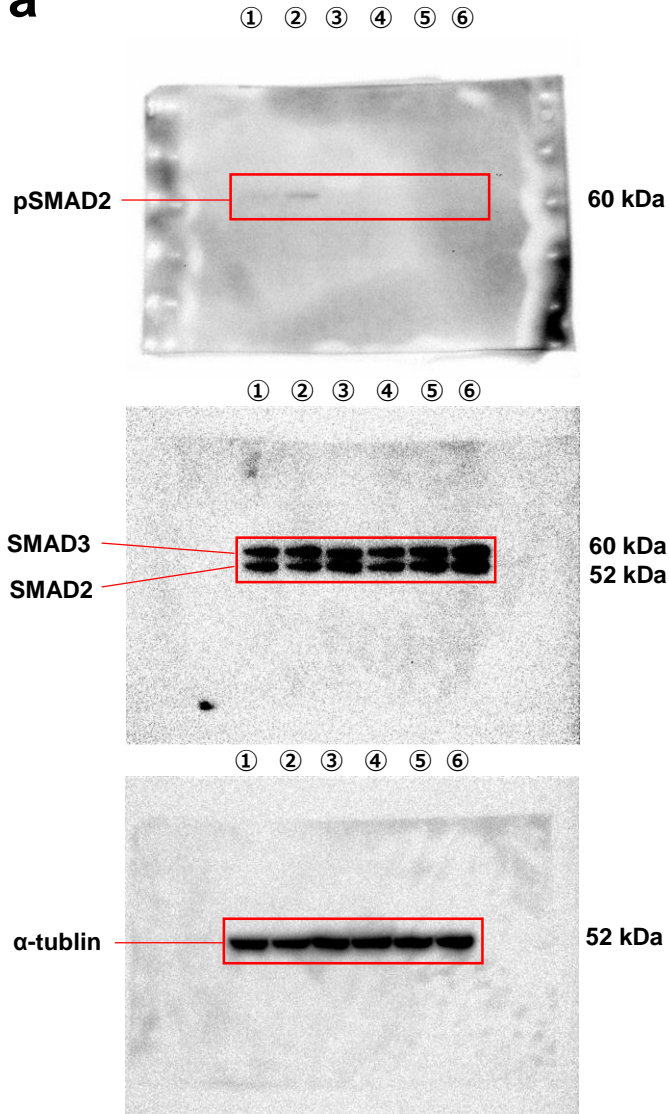

- ① No treatment
- ② 0.0025% BAC
- ③ 10  $\mu$ M SB431542
- ④ 0.0025% BAC + 10  $\mu$ M SB431542
- ⑤ 30  $\mu$ M SB431542
- ⑥ 0.0025% BAC + 30  $\mu$ M SB431542

**b**

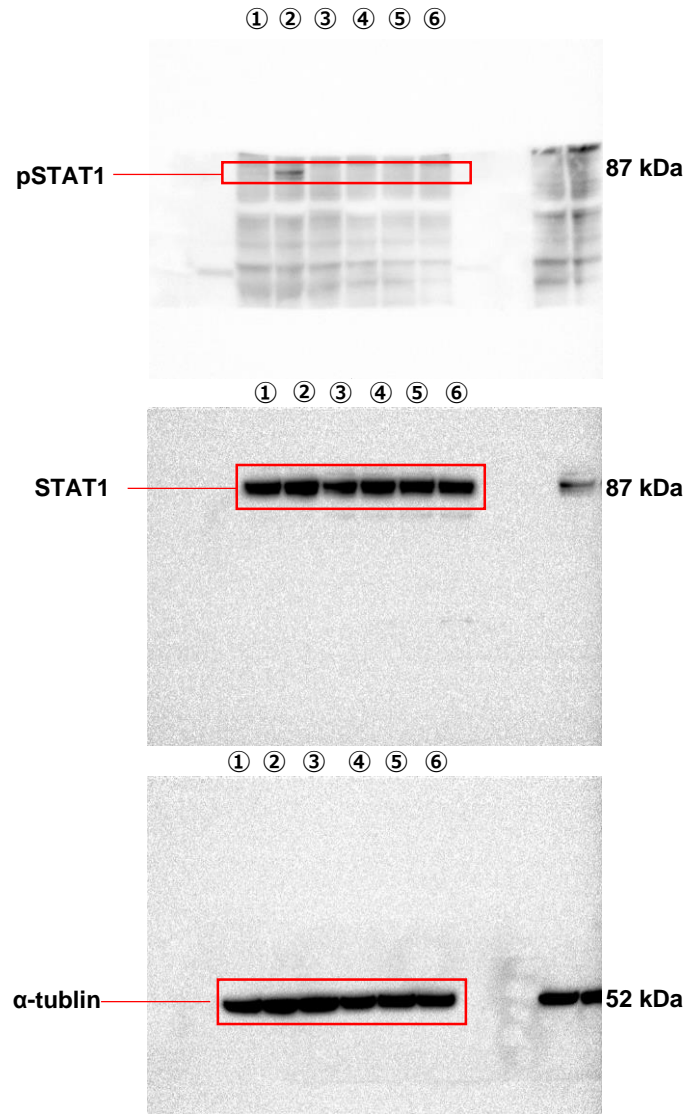

- ① No treatment
- ② 0.0025% BAC
- ③ 3  $\mu$ M ruxolitinib
- ④ 0.0025% BAC + 3  $\mu$ M ruxolitinib
- ⑤ 30  $\mu$ M ruxolitinib
- ⑥ 0.0025% BAC + 30  $\mu$ M ruxolitinib

**Supplementary Figure S6. Uncropped western blots used for the preparation of supplementary Figure S5. (a)** Expression of TGF $\beta$  signalling-related proteins.  $n = 3$  biological replicates. **(b)** Expression of JAK-STAT signalling-related proteins.  $n = 3$  biological replicates.



# Supplementary Figure S7

**a**

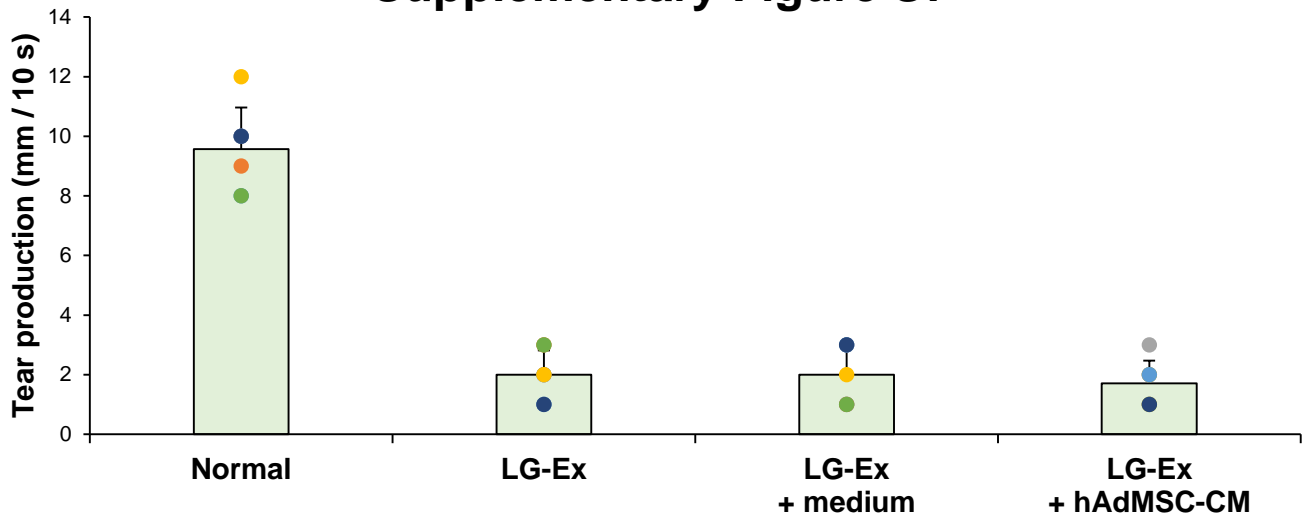

**b**

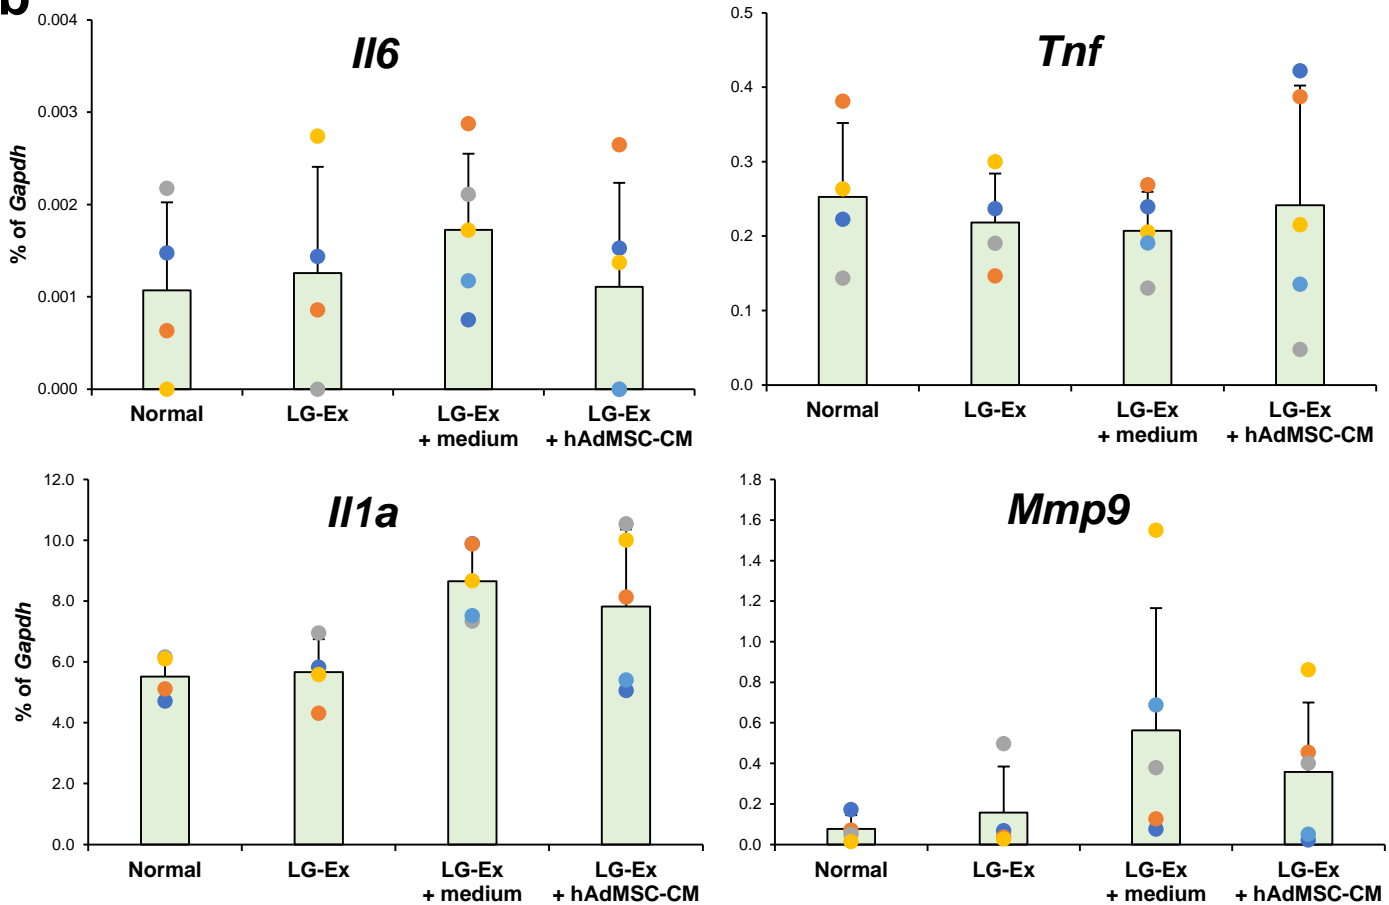

## Supplementary Figure S7. Examination of tear production and corneal inflammation in LG-Ex rats.

(a) Measurement of tear production in SD (Normal), LG-Ex, LG-Ex with ocular instillation of medium (LG-Ex + medium), and LG-Ex with ocular instillation of hAdMSC-CM (LG-Ex + hAdMSC-CM) rats 1 week after ocular instillation. The results are presented as the mean  $\pm$  SD;  $n = 7$  biological replicates. (b) Expression levels of inflammation related-genes in the cornea of Normal, LG-Ex, LG-Ex + medium, and LG-Ex + hAdMSC-CM rats. The results are presented as the mean  $\pm$  SD;  $n = 4$  (Normal and LG-Ex) and  $n = 5$  (LG-Ex + medium and LG-Ex + hAdMSC-CM) biological replicates.
